# Supplementary material for: Comparative genomics of 16 Microbacterium spp. that tolerate multiple heavy metals and antibiotics
Source: PeerJ. 2019 Jan 14;6:e6258. doi: 10.7717/peerj.6258 (PMC6336093; doi:10.7717/peerj.6258)
Supplement: Supplemental Information 7 [file peerj-07-6258-s007.xlsx]

## Sheet: Sheet1 (3)
All plates are 10% TSA	Cr					Ni				Co				Cd				Cu		Zn
Isolates	0 mM	0.5 mM	2 mM	10 mM	20 mM	0.1 mM	1 mM	5 mM	10 mM	0.1 mM	1 mM	2 mM	5 mM	0.1 mM	1 mM	2 mM	5 mM	0.1 mM	1 mM	0.1 mM	1 mM
Microbacterium sp. A20	✔	✔	✔	✔	0	✔	0	-	-	✔	-	-	-	✔	-	-	-	✔	0	✔	✔
2nd plate	✔	✔	✔	0	0	✔	0	-	-	✔	-	-	-	✔	-	-	-	✔	*	✔	✔
Microbacterium sp. K19	✔	✔	✔	-	-	✔	✔	-	-	✔	-	-	-	-	-	-	-	✔	✔	✔	✔
2nd plate	✔	✔	✔	-	-	✔	✔	-	-	✔	-	-	-	0	-	-	-	✔	✔	✔	✔
Microbacterium sp. K21	✔	✔	✔	-	-	✔	0	-	-	✔	-	-	-	✔	-	-	-	✔	✔	✔	0
2nd plate	✔	✔	✔	-	-	✔	0	-	-	✔	-	-	-	✔	-	-	-	✔	✔	✔	*
Microbacterium sp. K22	✔	✔	✔	-	-	✔	✔	-	-	✔	-	-	-	✔	-	-	-	✔	✔	✔	-
2nd plate	✔	✔	✔	-	-	✔	0	-	-	✔	-	-	-	✔	-	-	-	✔	0	0	-
Microbacterium sp. K24	✔	✔	✔	✔	✔	✔	0	-	-	✔	✔	-	-	-	-	-	-	✔	✔	✔	✔
2nd plate	✔	✔	✔	✔	✔	✔	0	-	-	✔	✔	-	-	-	-	-	-	✔	✔	✔	✔
Microbacterium sp. K27	✔	✔	✔	-	-	✔	✔	-	-	✔	✔	-	-	0	-	-	-	✔	0	✔	0
2nd plate	✔	✔	✔	-	-	✔	✔	-	-	0	-	-	-	0	-	-	-	✔	0	✔	-
Microbacterium sp. K2B2	✔	✔	-	-	-	✔	-	-	-	-	-	-	-	✔	-	-	-	✔	0	✔	0
2nd plate	✔	✔	-	-	-	✔	-	-	-	-	-	-	-	✔	-	-	-	✔	-	0	-
Microbacterium sp. K30	✔	✔	✔	✔	✔	✔	0	-	-	✔	✔	-	-	✔	-	-	-	✔	0	✔	✔
2nd plate	✔	✔	✔	✔	✔	✔	0	-	-	✔	✔	-	-	✔	-	-	-	✔	0	✔	✔
Microbacterium sp. K31	✔	✔	✔	-	-	✔	-	-	-	0	-	-	-	0	-	-	-	✔	✔	✔	0
2nd plate	✔	✔	✔	-	-	✔	-	-	-	0	-	-	-	0	-	-	-	✔	✔	✔	0
Microbacterium sp. K33	✔	✔	✔	✔	✔	✔	✔	-	-	✔	-	-	-	✔	-	-	-	✔	✔	✔	✔
2nd plate	✔	✔	✔	✔	✔	✔	✔	-	-	✔	-	-	-	✔	-	-	-	✔	0	✔	✔
Microbacterium sp. K35	✔	✔	✔	-	-	✔	-	-	-	✔	-	-	-	0	-	-	-	✔	✔	✔	-
2nd plate	✔	✔	✔	-	-	✔	-	-	-	✔	-	-	-	0	-	-	-	✔	*	0	-
Microbacterium sp. K36	✔	✔	-	-	-	✔	0	-	-	✔	-	-	-	✔	-	-	-	✔	0	0	-
2nd plate	✔	✔	-	-	-	✔	0	-	-	✔	-	-	-	✔	-	-	-	✔	*	0	-
Microbacterium sp. K40	✔	✔	-	-	-	✔	0	-	-	✔	-	-	-	✔	-	-	-	✔	✔	✔	0
2nd plate	✔	✔	-	-	-	✔	✔	-	-	✔	-	-	-	✔	-	-	-	✔	✔	✔	*
Microbacterium sp. K41	✔	✔	✔	-	-	✔	0	-	-	✔	-	-	-	0*	-	-	-	✔	0	✔	-
2nd plate	✔	✔	✔	-	-	✔	0	-	-	✔	-	-	-	0*	-	-	-	✔	✔	✔	-
Microbacterium sp. K5D	✔	✔	✔	-	-	✔	0	-	-	0	-	-	-	0	-	-	-	✔	0	✔	0
2nd plate	✔	✔	✔	-	-	✔	0	-	-	0	-	-	-	0	-	-	-	✔	✔	✔	-
Microbacterium sp. PF3	✔	✔	✔	✔	✔	✔	0	-	-	✔	-	-	-	-	-	-	-	✔	0	✔	✔
2nd plate	✔	✔	✔	✔	✔	✔	0	-	-	✔	-	-	-	-	-	-	-	✔	✔	✔	0
Scores
"✔" means growth, less then 0 mM but still pretty thick and visialbe
"0" means very little visible growth
"-" means no obvious growth
"*" Very very thin
